# Supplementary material
Source: publisher site journal article supplement (https://study.sagepub.com/sites/default/files/11%20Bloomberg%203e%20Appendix%20T.pdf)
Supplement: Supplementary file 1 [file 11%20Bloomberg%203e%20Appendix%20T.pdf]

## Appendix T. Data Summary Table: Motivation for Enrollment in Doctoral Program

|       | Name    | Extrinsic Factors |               | Intrinsic Factors    |                   |                                |
|-------|---------|-------------------|---------------|----------------------|-------------------|--------------------------------|
|       |         | Credentials       | Marketability | Personal Fulfillment | Take on Challenge | Desire for Continuous Learning |
| 1     | Mollie  |                   | X             | X                    |                   |                                |
| 2     | Hank    | X                 |               |                      |                   |                                |
| 3     | Morris  |                   |               |                      | X                 | X                              |
| 4     | Debbie  |                   | X             |                      |                   | X                              |
| 5     | Doris   |                   |               | X                    |                   |                                |
| 6     | Anthony | X                 |               |                      |                   |                                |
| 7     | Anne    | X                 |               |                      |                   |                                |
| 8     | Brent   | X                 |               |                      |                   |                                |
| 9     | Angela  |                   | X             | X                    | X                 |                                |
| 10    | Jane    | X                 |               |                      |                   |                                |
| 11    | Brad    |                   | X             | X                    |                   |                                |
| 12    | Dexter  |                   | X             |                      |                   |                                |
| 13    | Frankie |                   | X             | X                    | X                 |                                |
| 14    | Sally   | X                 |               |                      |                   |                                |
| 15    | Shana   |                   |               | X                    |                   |                                |
| 16    | Lin     | X                 |               | X                    |                   |                                |
| 17    | Carin   |                   | X             |                      |                   |                                |
| 18    | Fay     | X                 |               |                      |                   |                                |
| 19    | Connie  | X                 |               |                      |                   |                                |
| 20    | Julia   |                   | X             | X                    |                   |                                |
| TOTAL | 20      | 9 (45%)           | 8 (40%)       | 8 (40%)              | 3 (15%)           | 2 (10%)                        |
